# Supplementary material for: The Nature of Pointer States and Their Role in Macroscopic Quantum Coherence
Source: Preprints.org preprint supplement (doi:10.20944/preprints202307.0325.v1), 2023-07-05
Supplement: Supplementary file 1 [file supplementary]

Hi Philip,

Yes, I'm happy for you to use that image. I skimmed your article and enjoyed that!

regards  
Dan

Daniel P. Lathrop  
Professor of Physics and Professor of Geology  
Member of two cross-disciplinary Institutes: IREAP and IPST  
Two Affiliate Departments: Electrical and Computer Eng and Dept of Mechanical Engineering  
University of Maryland, College Park, MD 20742  
Office: (301) 405-1594  
<http://complex.umd.edu>  
3319 A.V. Williams  
Office map: <https://complex.umd.edu/images/officemap.html>

On Wed, May 17, 2023 at 1:14 PM Philip Turner <[pturner.physics@outlook.com](mailto:pturner.physics@outlook.com)> wrote:

Dear Professor Lathrop

I am writing to enquire about the possibility of including an image from one of your papers in a journal article that we are about to submit for publication.

The image in question is from Bewely G.P., Lathrop. D.P., Sreenivasan. K. R. Superfluid helium. Visualization of quantized vortices. NATURE. Vol 44.1 p 588. June 2006.

For your reference I have attached a copy of the draft paper, which includes your figure as Fig 10.

You will see from the paper that whilst we could simply reference the image, its inclusion within the paper adds substantially to the flow and assists in illustrating several important points within the paper.

I hope that you can agree to its inclusion.

I look forward to hearing from you.

Kind regards

Philip Turner & Laurent Nottale
